# Supplementary material for: A facile one-step synthesis of super-hydrophilic (NH4)0.33WO3/WS2 composites: a highly efficient adsorbent for methylene blue
Source: Royal Society of Chemistry journal article supplement (doi:10.1039/d0nj01075h), 2020-01-01
Supplement: d0nj01075h1.pdf [file d0nj01075h1.pdf]

## Supporting Information of

### Facile One-step Synthesis of super-hydrophilicity $(\text{NH}_4)_{0.33}\text{WO}_3/\text{WS}_2$

#### Composites: A Highly Efficient Adsorbent for Methylene Blue

Shuai Zhang, Ying Yang\*, Lishuang Xu, Hui Yu\*, Dan Li, Xinlu Wang and Xiangting Dong\*

Key Laboratory of Applied Chemistry and Nanotechnology at Universities of Jilin Province, Changchun University of

Science and Technology, Changchun 130022.

Tel.: 86-0431-85583425 Fax: 86-0431-85383815 E-mail: yangying0807@126.com

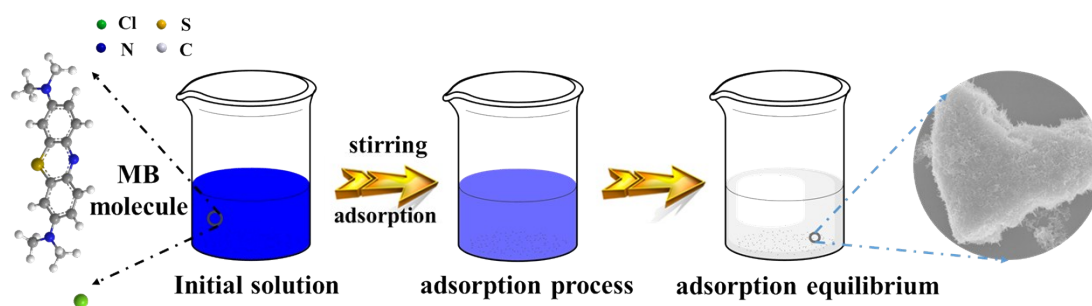

Fig. S1 Scheme for the adsorption of samples.

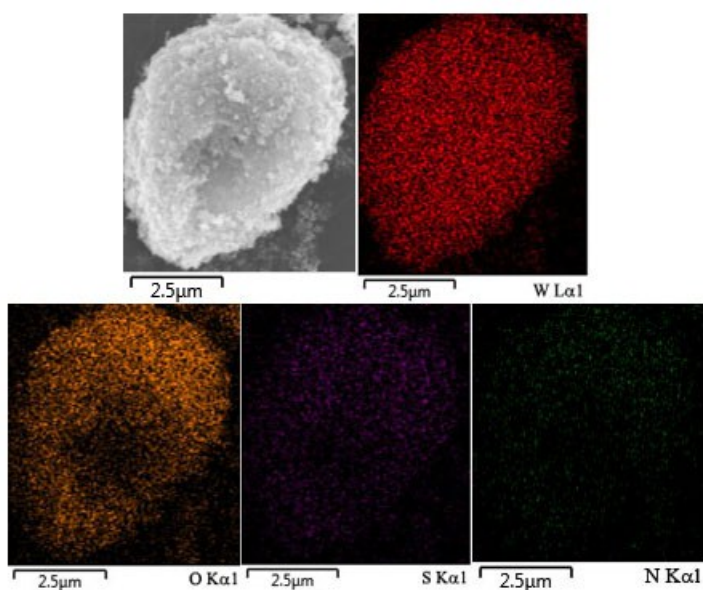

Fig. S2 EDS spectra of ATBDs-3.

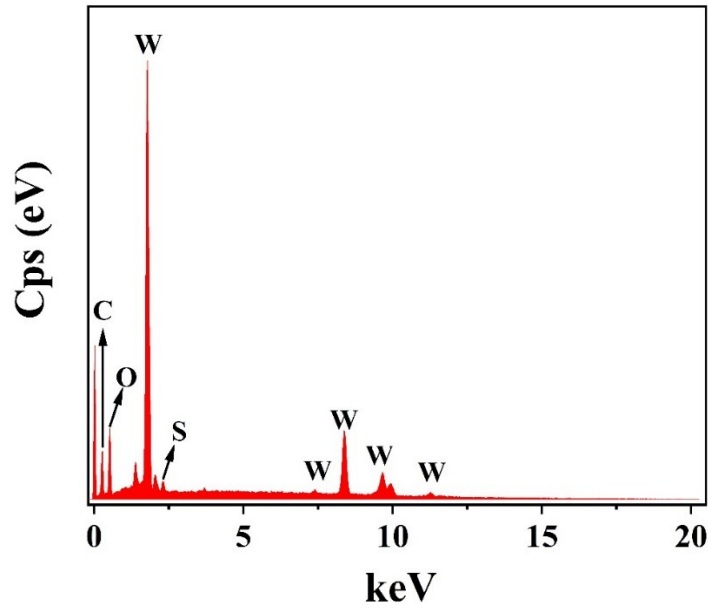

Fig. S3 EDS spot scan result of ATBDs-3.

Tab. S1 Chemical composition of W, O and S elements.

| Element | Chemical composition |        |
|---------|----------------------|--------|
|         | wt%                  | at%    |
| W       | 80.35                | 25.697 |
| O       | 18.71                | 72.498 |
| S       | 0.93                 | 1.805  |

EDS spot scan can briefly and quantitatively describe the composition of material elements<sup>[1, 2]</sup>. As showed in Fig. S3, the presence of C, W, O and S elements were detected. C element was from test substrate (conductive adhesive). Notably, N element, as a nonmetallic element, is difficult to be quantitatively characterized, so the content of N element is not shown here. The chemical composition of W, O and S elements was showed in Tab. S1. The composition molar ratio of S element is 1.8 %. The low recombination of S element was also one of the reasons why the WS<sub>2</sub> diffraction peak in the XRD was not obvious. The molar ratio of W/O is 2.82, which is basically

consistent with the ratio of W/O in ammonium tungsten bronze.

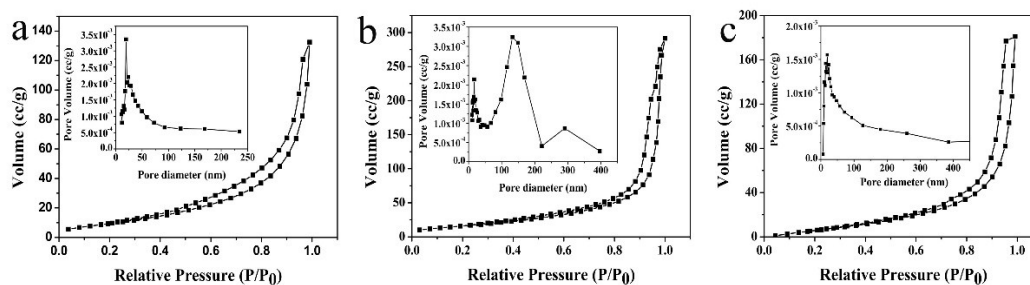

Fig. S4 Nitrogen adsorption-desorption isotherms and pore diameter distribution of (a) ATBDs-2, (b) ATBDs-3, (c) ATBDs-4.

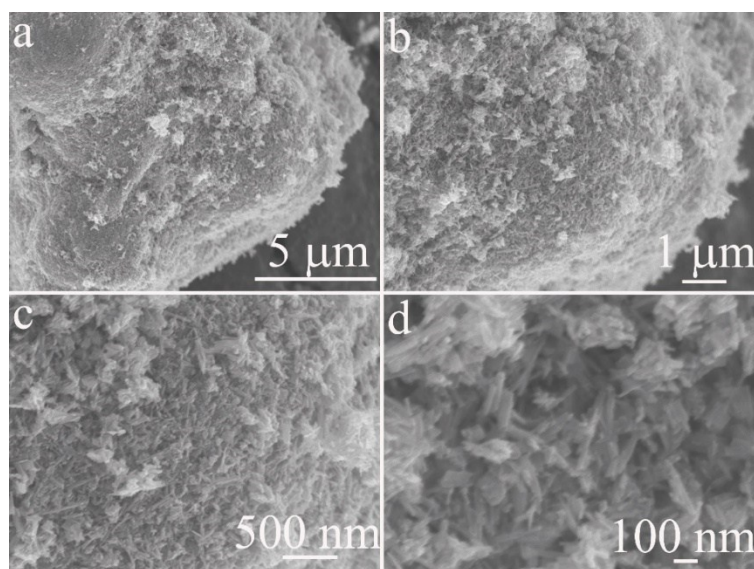

Fig. S5 FESEM images of ATBDs-3 at different magnification.

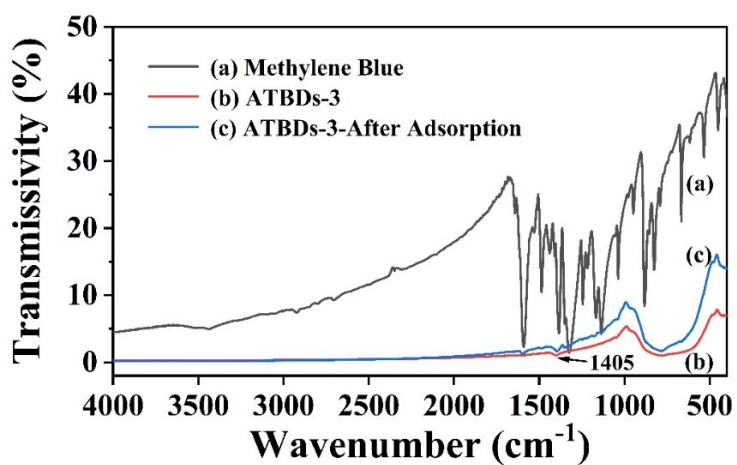

Fig. S6 FTIR spectra of (a) methylene blue, (b) ATBDs-3 and (c) ATBDs-3-After Adsorption.

In Fig. S6, the existence of sharp diffraction peaks of (a) at 830, 886, 1041, 1138, 1174, 1221, 1248, 1327, 1387, 1441, 1490 and 1597  $\text{cm}^{-1}$  correspond to standard methylene blue spectrum<sup>3</sup>. The spectra of (b) ATBDs-3 and (c) ATBDs-3-After Adsorption were very similar, which indicated that after adsorption, the structure of ATBDs-3 did not change significantly, but also was affected by the adsorbed dye. Specifically, the broad peak in the 1000-500  $\text{cm}^{-1}$  was attributed to W–O–W stretching mode<sup>4</sup>. And, it was worth noting that there was a characteristic relatively weak peak at 1405  $\text{cm}^{-1}$  belonging to ammonium ion<sup>4, 5</sup>, which auxiliary proved the successful synthesis of ammonium tungsten bronze. Simultaneously, in the range of 2000 to 4000  $\text{cm}^{-1}$ , ATBDs-3 showed extremely low transmissivity (shielding effect) to infrared light<sup>6</sup>.

1. P.-c. Ke and Z.-h. Liu, *Transactions of Nonferrous Metals Society of China*, 2019, **29**, 876-892.
2. J. Tao, L. Zhang, G. Wu, A. Chen, X. Zhang and C. Shi, *Materials Science and Engineering: A*, 2018, **717**, 11-19.
3. *Chemistry database*, www.organchem.csdb.cn (accessed February 16, 2020).
4. A. Rougier, F. Portemer, A. Quédé and M. El Marssi, *Applied Surface Science*, 1999, **153**, 1-9.
5. M. Saadoun, *Applied Surface Science*, 2003, **210**, 240-248.
6. T. Wang, Y. Li, J. Li, Z. Feng, D. Sun, B. Zhao, Y. Xu, R. Li and H. Cai, *RSC Advances*, 2014, **4**, 43366-43370.
